# Supplementary material for: Unveiling the reaction mechanism of an Sb2S3–Co9S8/NC anode for high-performance lithium-ion batteries
Source: Royal Society of Chemistry journal article supplement (doi:10.1039/d1nr06069d), 2021-01-01
Supplement: d1nr06069d1.pdf [file d1nr06069d1.pdf]

**Unveiling the Reaction Mechanism of Sb<sub>2</sub>S<sub>3</sub>-Co<sub>9</sub>S<sub>8</sub>/NC Anode for High-  
Performance Lithium-Ion Batteries**

Guanxia Ke <sup>a#</sup>, Xiaochao Wu <sup>a#</sup>, Huanhui Chen <sup>a, b#</sup>, Wanqing Li <sup>a</sup>, Shuang Fan <sup>a</sup>, Hongwei Mi <sup>a\*</sup>,

Yongliang Li <sup>a</sup>, Qianling Zhang <sup>a</sup>, Chuanxin He <sup>a</sup>, Xiangzhong Ren <sup>a\*</sup>

*<sup>a</sup>College of Chemistry and Environmental Engineering, International Joint Research Center for  
Molecular Science, Shenzhen University, Shenzhen, Guangdong 518060, P.R. China*

*<sup>b</sup>Shenzhen Engineering Laboratory of Flexible Transparent Conductive Films, School  
of Materials Science and Engineering, Harbin Institute of Technology, Shenzhen*

*518055, P.R. China*

Corresponding author:

Xiangzhong Ren, E-mail: renxz@szu.edu.cn, Tel/Fax: +86-755-26558134

Hongwei Mi, E-mail: milia807@szu.edu.cn, Tel/Fax: +86-755-26538657

# These authors contributed equally to this work and should be considered as co-first authors.

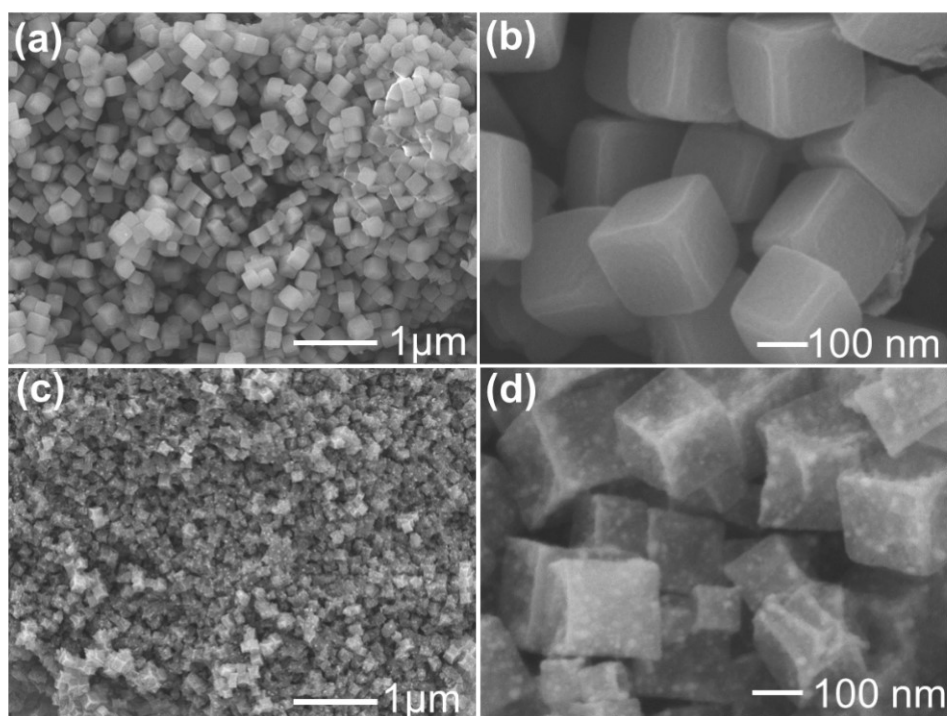

**Fig. S1.** SEM images of (a-b) the ZIF-67 sample and (c-d) the Co/NC sample.

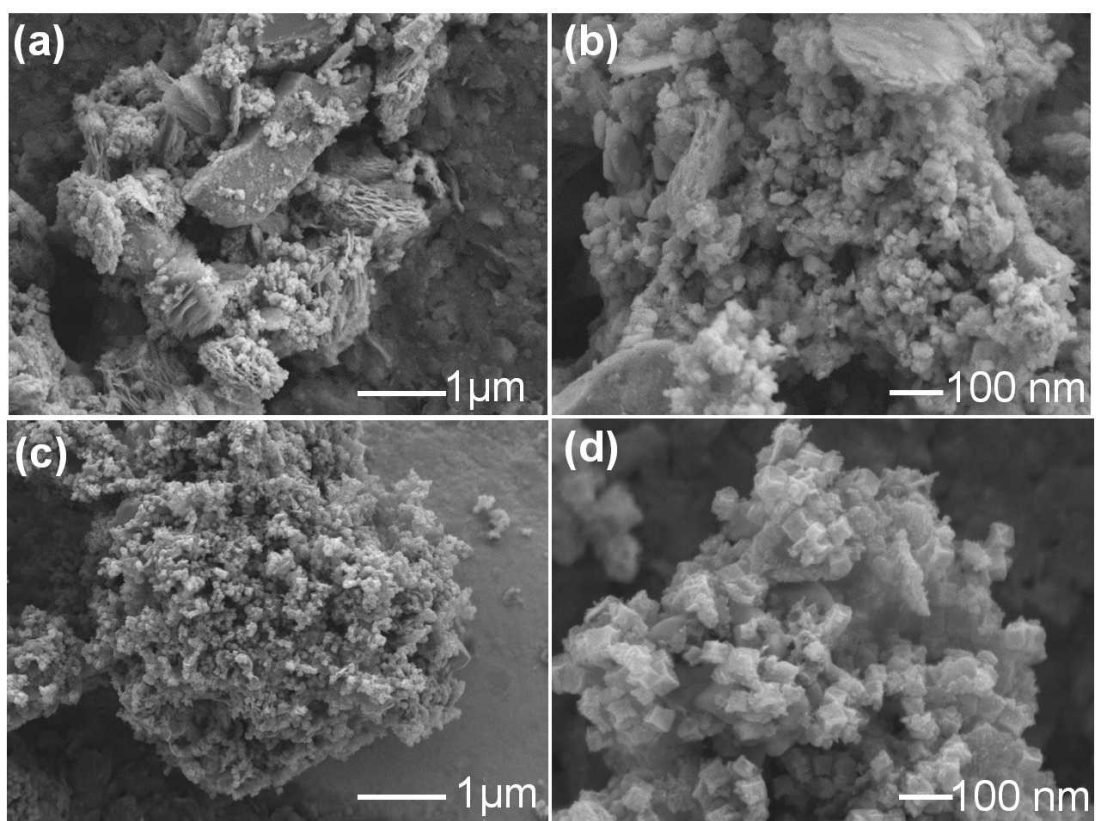

**Fig. S2.** SEM images of (a-b) the Sb<sub>2</sub>S<sub>3</sub> sample and (c-d) the Co<sub>9</sub>S<sub>8</sub>/NC sample.

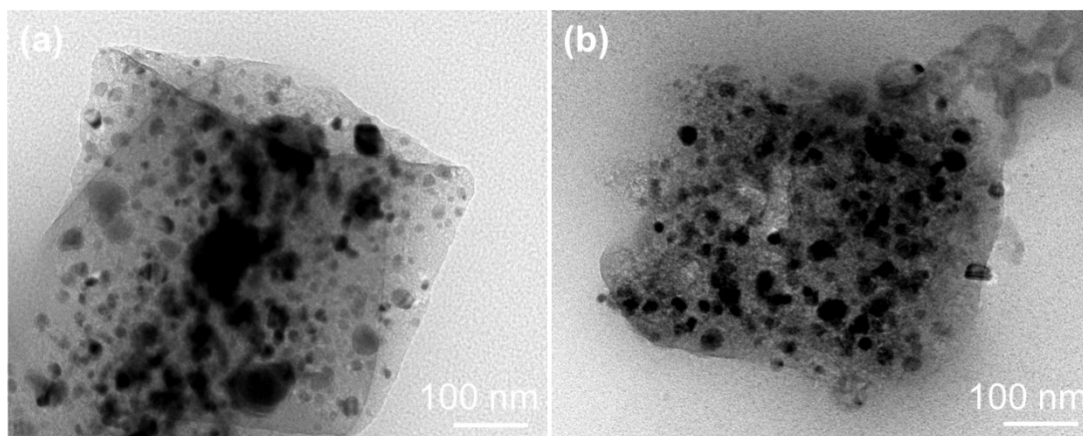

**Fig. S3.** TEM images of (a) the Co/NC sample and (b) the Co<sub>9</sub>S<sub>8</sub>/NC sample.

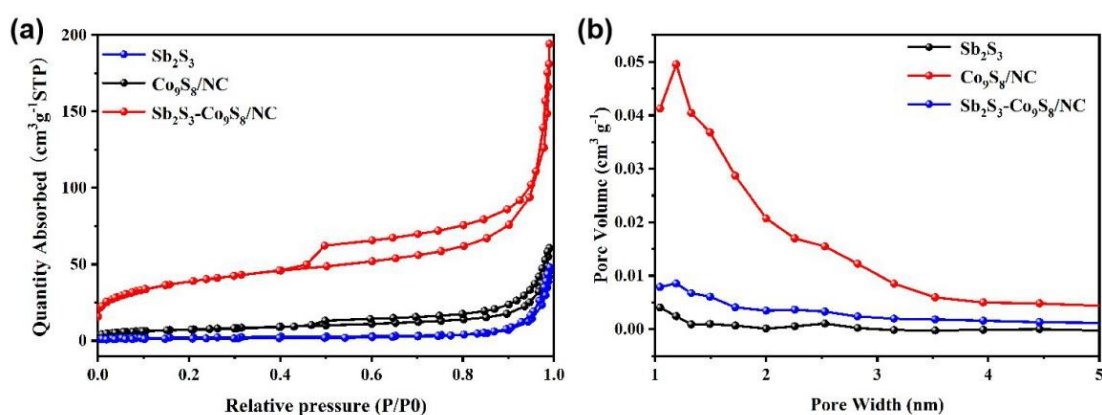

**Fig. S4.** (a) Nitrogen adsorption-desorption isotherm curves and (b) pore size distributions of Sb<sub>2</sub>S<sub>3</sub>, Co<sub>9</sub>S<sub>8</sub>/NC and Sb<sub>2</sub>S<sub>3</sub>-Co<sub>9</sub>S<sub>8</sub>/NC samples.

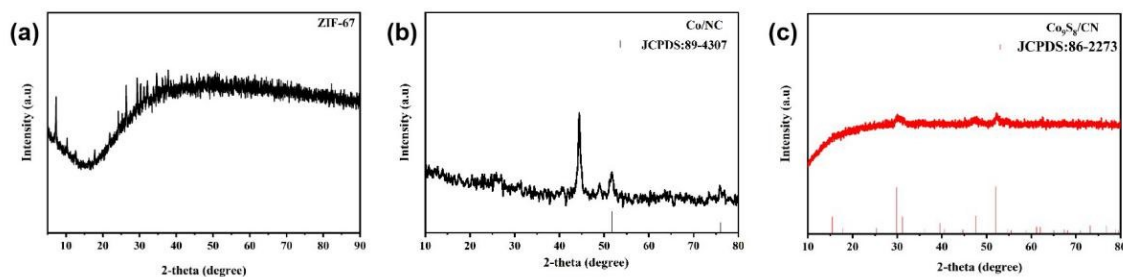

**Fig. S5.** XRD of (a) ZIF-67 sample, (b) Co/NC sample and (c) Co<sub>9</sub>S<sub>8</sub>/NC sample.

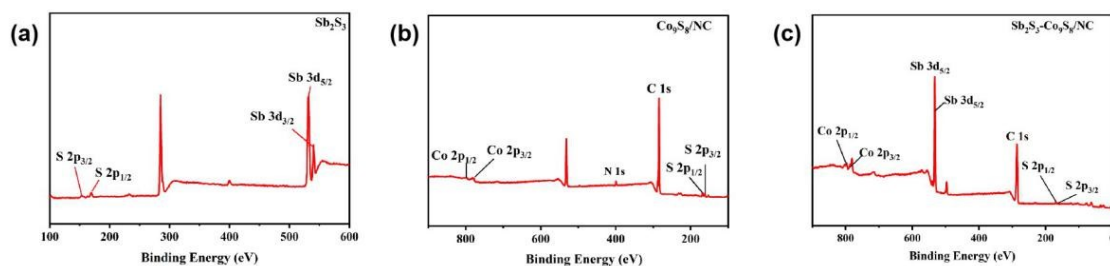

**Fig. S6.** XPS spectra of (a) the Sb<sub>2</sub>S<sub>3</sub>, (b) Co<sub>9</sub>S<sub>8</sub>/NC and (c) Sb<sub>2</sub>S<sub>3</sub>-Co<sub>9</sub>S<sub>8</sub>/NC.

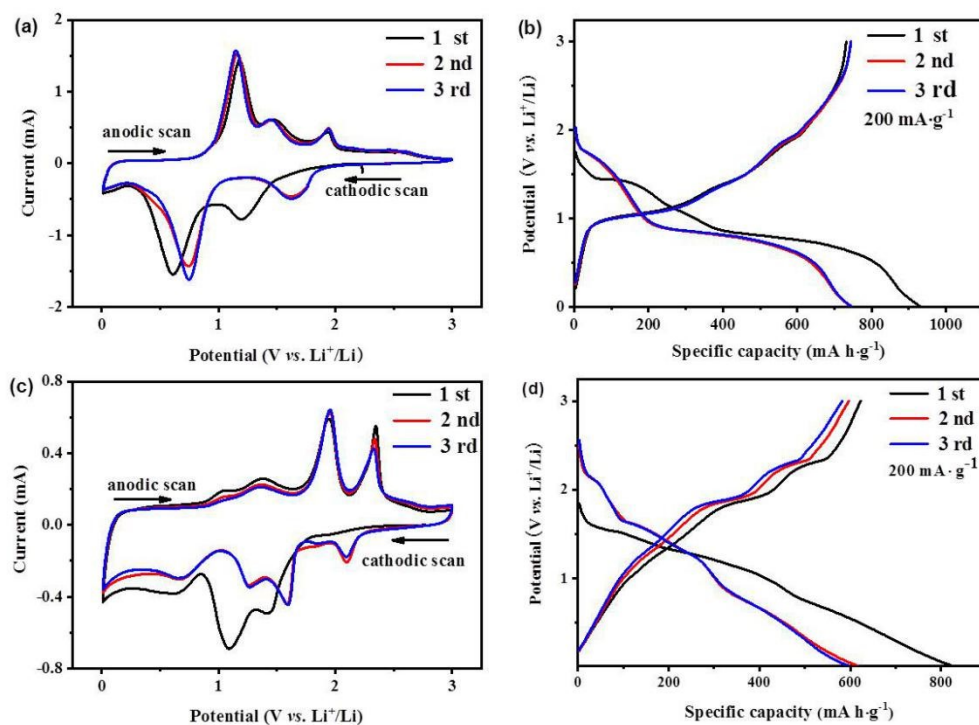

**Fig. S7.** (a)(c) CV curves of  $\text{Sb}_2\text{S}_3$  and  $\text{Co}_9\text{S}_8/\text{NC}$  in the potential range at 0.01-3 V at  $0.2 \text{ mV}\cdot\text{s}^{-1}$ ; (b)(d) the discharge-charge curves of the  $\text{Sb}_2\text{S}_3$  and  $\text{Co}_9\text{S}_8/\text{NC}$  at a current density of  $0.2 \text{ A}\cdot\text{g}^{-1}$ .

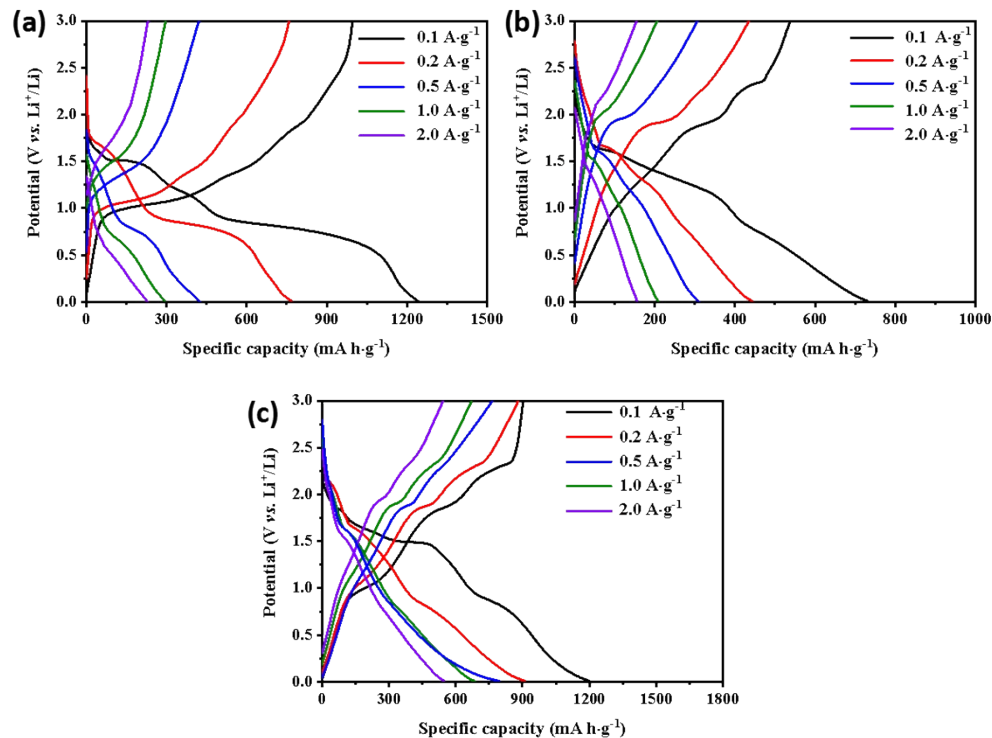

**Fig. S8.** The Charge / Discharge curves of  $\text{Sb}_2\text{S}_3$ (a),  $\text{Co}_9\text{S}_8/\text{NC}$ (b) and  $\text{Sb}_2\text{S}_3\text{-Co}_9\text{S}_8/\text{NC}$  at various rates.

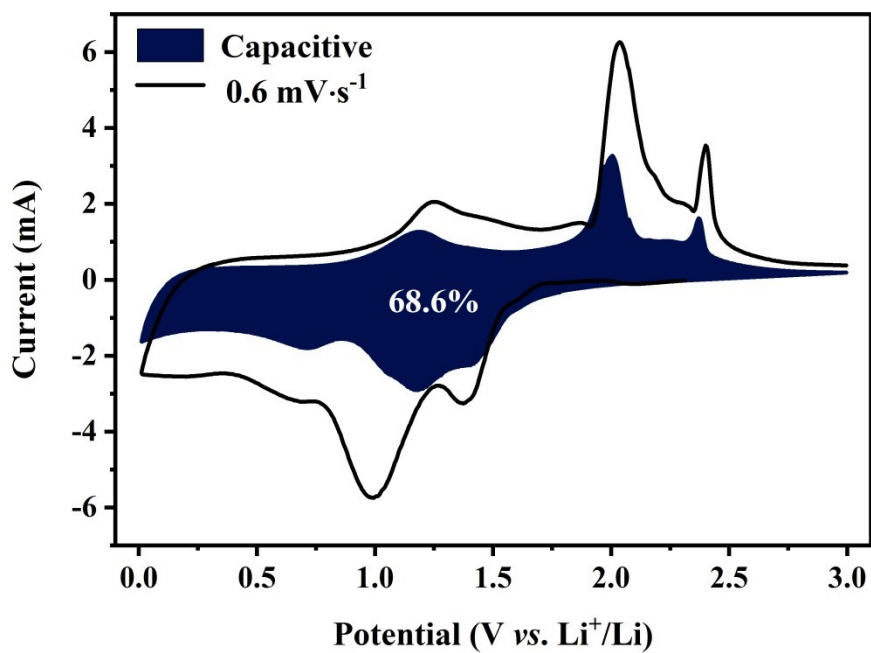

**Fig. S9.** CV curve with the pseudocapacitive contribution of  $\text{Sb}_2\text{S}_3\text{-Co}_9\text{S}_8/\text{NC}$  at  $0.6 \text{ mV}\cdot\text{s}^{-1}$ .

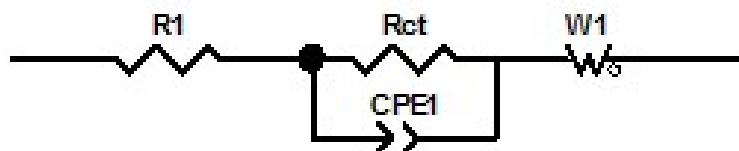

**Fig. S10.** The equivalent circuit of the samples.

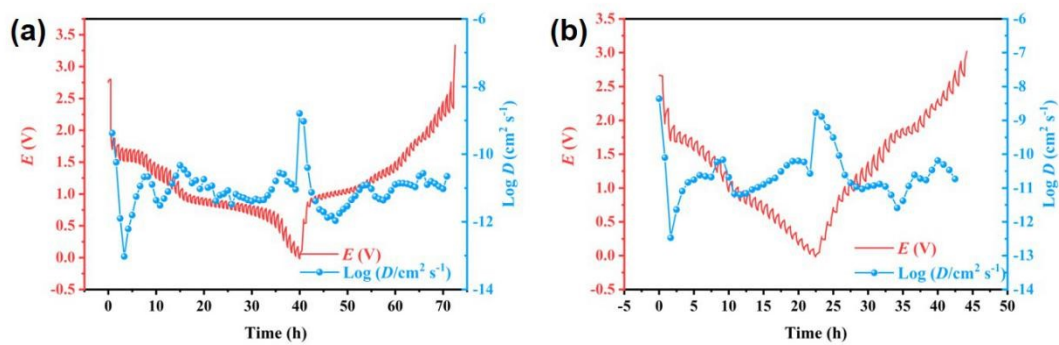

**Fig. S11.** GITT and  $\text{DLi}^+$  curves of (a)  $\text{Sb}_2\text{S}_3$  electrode and (b)  $\text{Co}_9\text{S}_8/\text{NC}$  electrode.

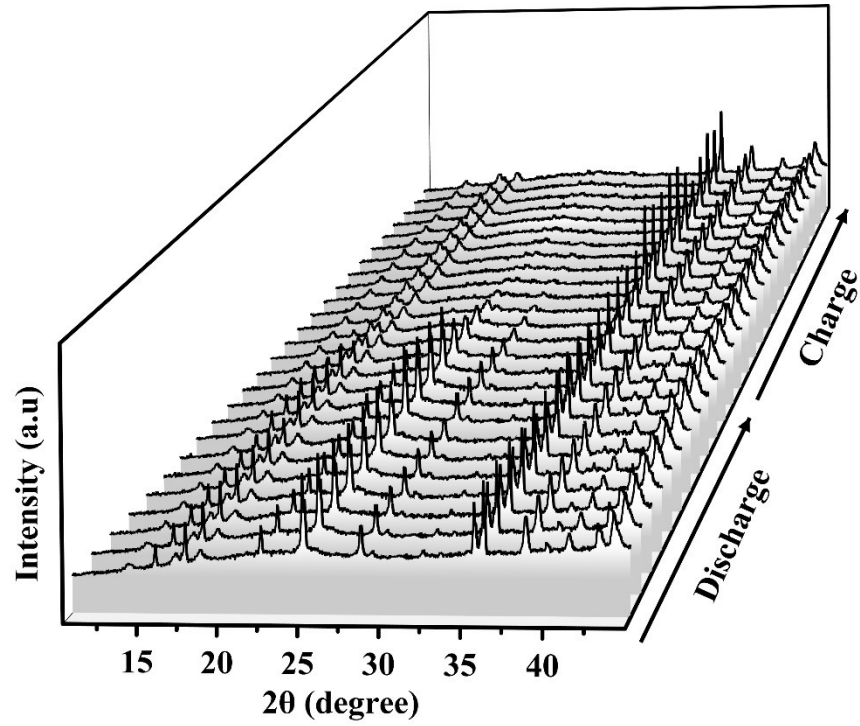

**Fig. S12.** 3D waterfall chart of  $\text{Sb}_2\text{S}_3\text{-Co}_9\text{S}_8/\text{NC}$  electrodes during the first cycle.

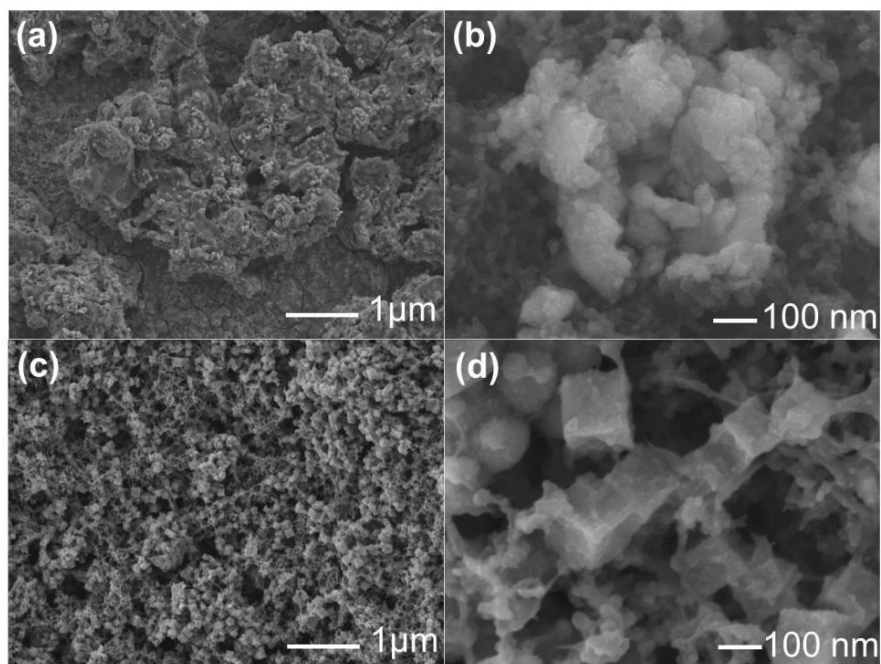

**Fig. S13.** SEM images of  $\text{Sb}_2\text{S}_3$  (a, b) and  $\text{Sb}_2\text{S}_3\text{-Co}_9\text{S}_8/\text{NC}$  (c, d) at different magnifications after 100 cycles.

**Table S1.** Element content for Sb<sub>2</sub>S<sub>3</sub>-Co<sub>9</sub>S<sub>8</sub>/NC obtained from ICP analysis.

| Mass(g) | Element | Elemental content (mg·L <sup>-1</sup> ) | Weight (%) |
|---------|---------|-----------------------------------------|------------|
| 0.0344  | Co      | 6.37                                    | 18.52      |
| 0.0344  | S       | 6.43                                    | 18.68      |
| 0.0344  | Sb      | 3.07                                    | 8.92       |

**Table. S2.** Comparison of the electrochemical lithium storage performance of the Sb<sub>2</sub>S<sub>3</sub>-Co<sub>9</sub>S<sub>8</sub>/NC electrodes with the literature data.

| Materials                                                           | Current density (mA·g <sup>-1</sup> ) | cycle number (cycles) | Reversible Capacity (mA h·g <sup>-1</sup> ) | reference        |
|---------------------------------------------------------------------|---------------------------------------|-----------------------|---------------------------------------------|------------------|
| <b>Sb<sub>2</sub>S<sub>3</sub>-Co<sub>9</sub>S<sub>8</sub>/NC-2</b> | <b>2000</b>                           | <b>900</b>            | <b>616</b>                                  | <b>This work</b> |
| Sb <sub>2</sub> S <sub>3</sub> /EG-S                                | 5000                                  | 100                   | 548                                         | 1                |
| Sb <sub>2</sub> S <sub>3</sub> /CS                                  | 200                                   | 200                   | 566                                         | 2                |
| Co <sub>9</sub> S <sub>8</sub> @MoS <sub>2</sub>                    | 1000                                  | 300                   | 1048                                        | 3                |
| Co <sub>9</sub> S <sub>8</sub> /ZnS@NC                              | 1000                                  | 300                   | 411                                         | 4                |
| hollow core-shell ZnCoS@Co <sub>9</sub> S <sub>8</sub> /NC          | 2000                                  | 400                   | 1095                                        | 5                |
| NiS <sub>2</sub> @CoS <sub>2</sub> @C@C                             | 1000                                  | 100                   | 680                                         | 6                |
| Bi <sub>2</sub> S <sub>3</sub> @Co <sub>9</sub> S <sub>8</sub> CHPs | 500                                   | 800                   | 595                                         | 7                |
| Co <sub>9</sub> S <sub>8</sub> @MPCNF-15                            | 200                                   | 200                   | 654                                         | 8                |
| Co <sub>1-x</sub> S/NC@MoS <sub>2</sub> /C                          | 100                                   | 150                   | 910                                         | 9                |
| Co <sub>1-x</sub> S/NCS                                             | 200                                   | 100                   | 796                                         | 10               |

|                                                    |      |     |      |    |
|----------------------------------------------------|------|-----|------|----|
| CoS <sub>2</sub> -in-wall-NCSs                     | 200  | 500 | 1165 | 11 |
| Sb <sub>2</sub> S <sub>3</sub> hollow microspheres | 1000 | 100 | 600  | 12 |
| 2D Sb <sub>2</sub> S <sub>3</sub>                  | 2000 | 10  | 750  | 13 |

## References

1. Wang, S.; Cheng, Y.; Xue, H.; Liu, W.; Yi, Z.; Chang, L.; Wang, L. Multifunctional sulfur-mediated strategy enabling fast-charging Sb<sub>2</sub>S<sub>3</sub> micro-package anode for lithium-ion storage. *Journal of Materials Chemistry A* **2021**, *9*, 7838-7847.
2. Xie, J.; Xia, J.; Yuan, Y.; Liu, L.; Zhang, Y.; Nie, S.; Yan, H. Sb<sub>2</sub>S<sub>3</sub> embedded in carbon-silicon oxide nanofibers as high-performance anode materials for lithium-ion and sodium-ion batteries. *Journal Power Sources* **2019**, *435*, 226762.
3. Yang, K.; Mei, T.; Chen, Z.; Xiong, M.; Wang, X.; Wang, J.; Li, J.; Yu, L.; Qian, J.; Wang, X. Chinese hydrangea lantern-like Co<sub>9</sub>S<sub>8</sub>@MoS<sub>2</sub> composites with enhanced lithium-ion battery properties. *Nanoscale* **2020**, *12*, 3435-3442.
4. Duan, J.; Wang, Y.; Li, H.; Wei, D.; Wen, F.; Zhang, G.; Liu, P.; Li, L.; Zhang, W.; Chen, Z. Bimetal-organic Framework-derived Co<sub>9</sub>S<sub>8</sub>/ZnS@NC Heterostructures for Superior Lithium-ion Storage. *Chemistry an-Asian Journal* **2020**, *15*, 1613-1620.
5. Aslam, M K.; Shah, S. S.; Li, S.; Chen, C. Kinetically controlled synthesis of MOF nanostructures: single-holed hollow core-shell ZnCoS@Co<sub>9</sub>S<sub>8</sub>/NC for ultra-high performance lithium-ion batteries. *Journal of Materials Chemistry A* **2018**, *6*, 14083.
6. Lin, Y.; Qiu, Z.; Li, D.; Ullah, S.; Hai, Y.; Xin, H.; Liao, W.; Yang, B.; Fan, H.; Xu, J.; Zhu, C. NiS<sub>2</sub>@CoS<sub>2</sub> nanocrystals encapsulated in N-doped carbon nanocubes for high performance lithium/sodium ion batteries. *Energy Storage Materials* **2018**, *11*, 67-74.
7. Huang, Y.; Hu, X.; Li, J.; Zhang, J.; Cai, D.; Sa, B.; Zhan, H.; Wen, Z. Rational construction of heterostructured core-shell Bi<sub>2</sub>S<sub>3</sub>@Co<sub>9</sub>S<sub>8</sub> complex hollow particles toward high-performance Li- and Na-ion storage. *Energy Storage Materials*, **2020**, *29*, 121-130.
8. Zhou, X.; Su, K.; Kang, W.; Cheng, B.; Li, Z.; Jiang, Z. Locking metal sulfide nanoparticles in interconnected porous carbon nanofibers with protective macro-porous skin as freestanding anodes for lithium ion batteries. *Chemical Engineering Journal* **2020**, *397*, 125271.
9. Wang, Y.; Xie, W.; Li, D.; Han, P.; Shi, L.; Luo, Y.; Cong, G.; Li, C.; Yu, J.; Zhu, C.; Xu, J. One-pot synthesis of hierarchical Co<sub>1-x</sub>S/NC@MoS<sub>2</sub>/C hollow nanofibers based on one-dimensional metal coordination polymers for enhanced lithium and sodium-ion storage. *Science Bullent* **2020**, *65*, 1460-1469.
10. Yang, Z.; Wang, J.; Wu, H.; Kong, F.; Yin, W.; Cheng, H.; Tang, X.; Qian, B.; Tao, S. MOFs derived Co<sub>1-x</sub>S nanoparticles embedded in N-doped carbon nanosheets with improved electrochemical performance for lithium ion batteries. *Applied Surface Science* **2019**, *479*, 693-699.



11. Fang, L.; Zhang, Y.; Guan, Y.; Zhang, H.; Wang, S.; Wang, Y. CoS<sub>2</sub> nanodots trapped within graphitic structured N-doped carbon spheres with efficient performances for lithium storage *Journal Materials Chemistry A* 2018, **6**, 7148-7154.
12. Xie, J.; Liu, L.; Xia, J.; Zhang, Y.; Li, M.; Ouyang, Y.; Nie, S. Wang, X. Template-Free Synthesis of Sb<sub>2</sub>S<sub>3</sub> Hollow Microspheres as Anode Materials for Lithium-Ion and Sodium-Ion Batteries. *Nano-Micro Letters* **2018**, 10, 12.
13. Yao, S.; Cui, J.; Deng, Y.; Chong, W.; Kim, J. K. Ultrathin Sb<sub>2</sub>S<sub>3</sub> Nanosheet Anodes for Exceptional Pseudocapacitive Contribution to Multi-battery Charge Storage. *Energy Storage Material* **2018**, 20, 36-45.
